# Supplementary material for: A Novel Virus Causes Scale Drop Disease in Lates calcarifer
Source: PubMed Central journal article supplement (PMC4529248; doi:10.1371/journal.ppat.1005074), 2015-08-07

# S1 Figure

## Dotplot SDDV – *Megalocytivirus*

RBIV (AY532606)-SDDV

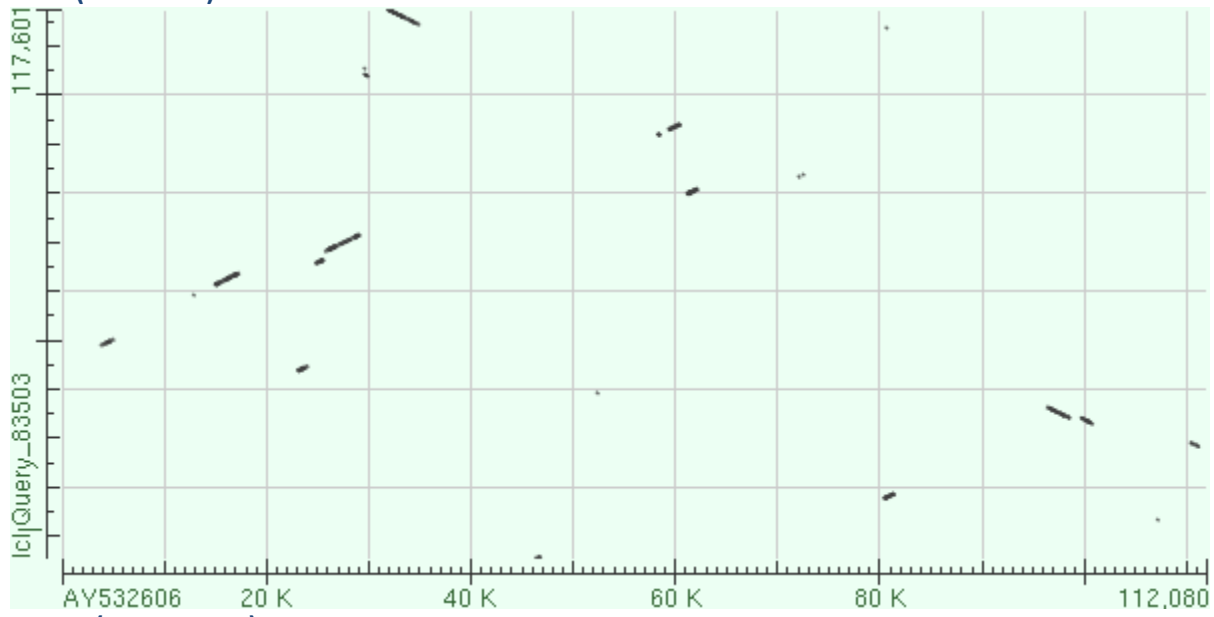

OSGIV (AY894343.1)-SDDV

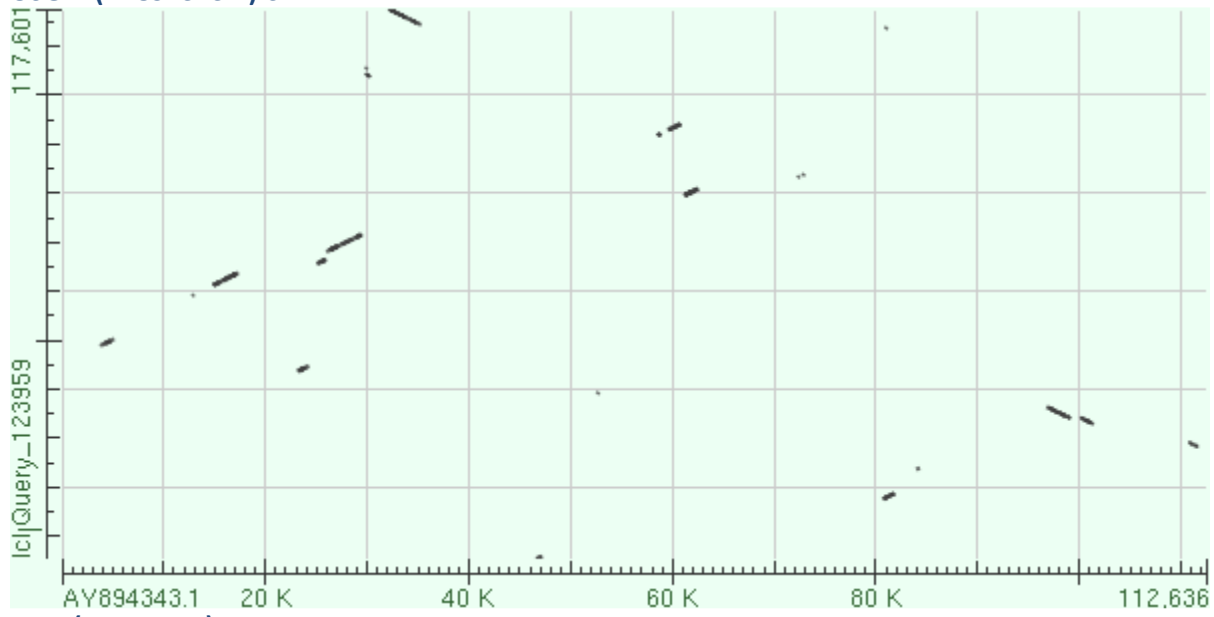

RSIV (BD143114)-SDDV

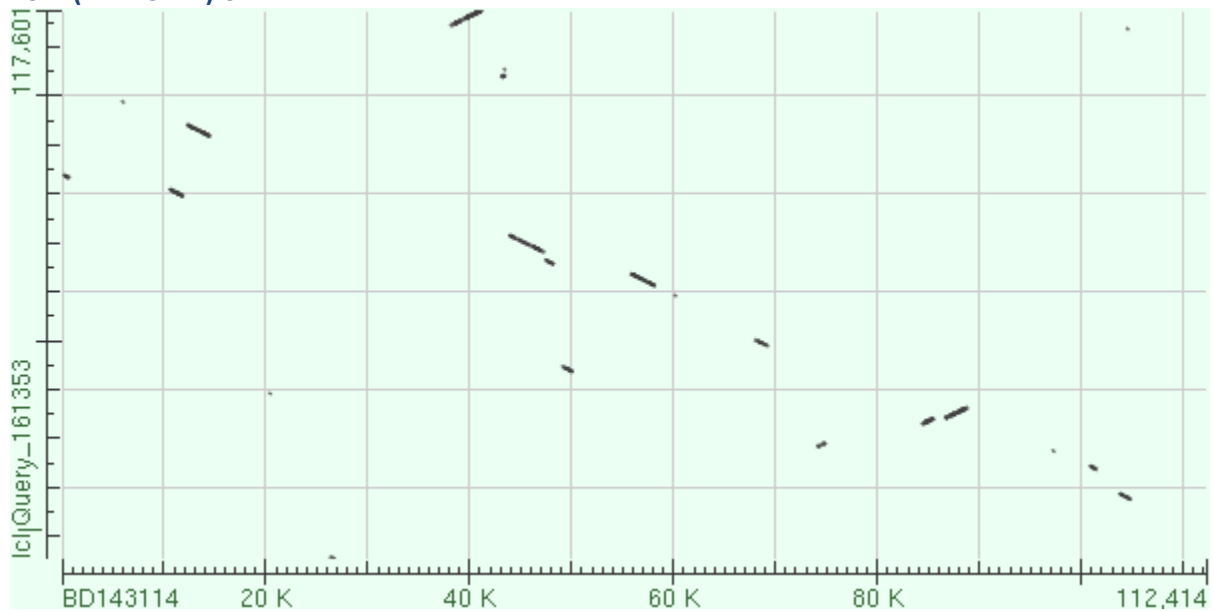

## Dotplot SDDV – *Megalocytivirus* (continued)

ISKNV (NC\_003494.1)-SDDV

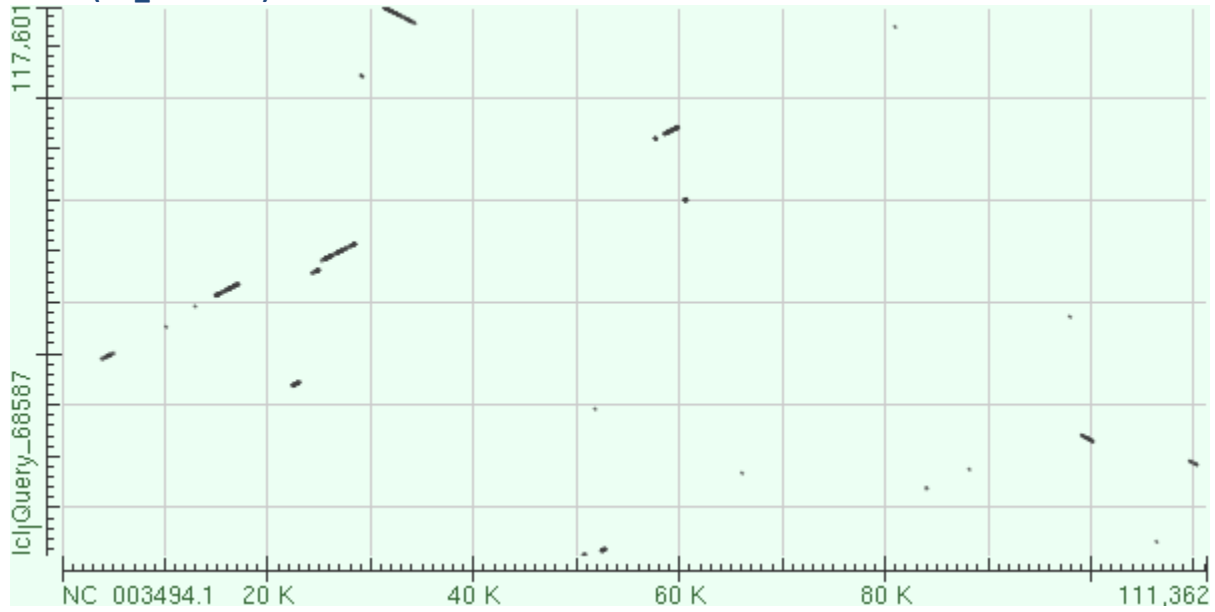

TRBIV (GQ273492.1)-SDDV

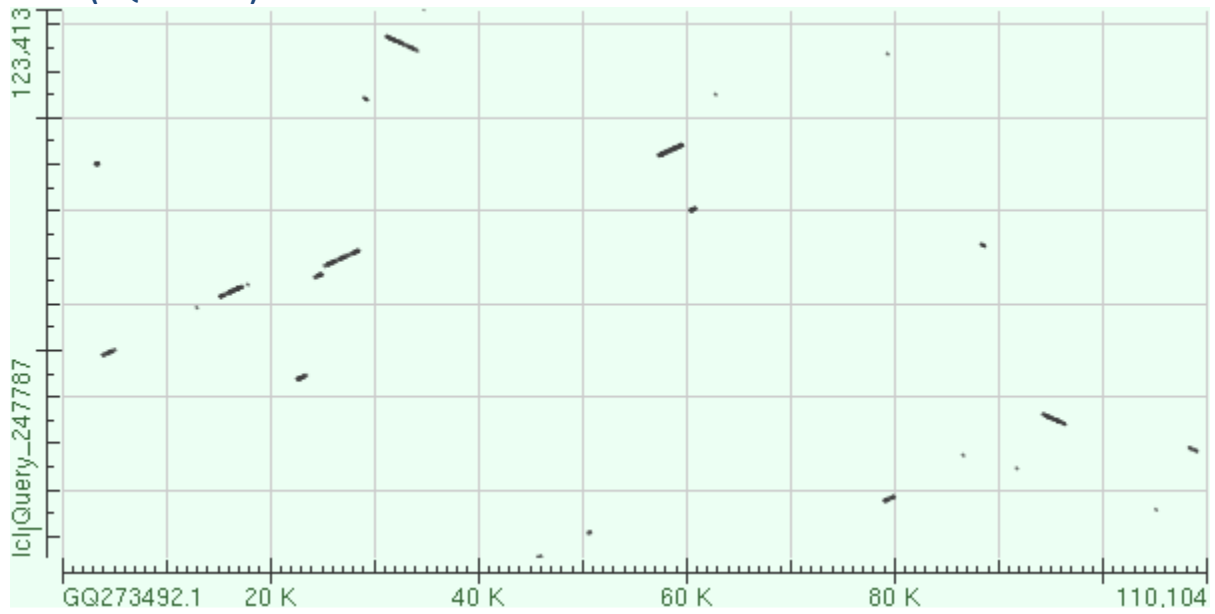

## Dotplot SDDV – *Chloriridovirus*

IIV-3 (NC\_008187.1)-SDDV

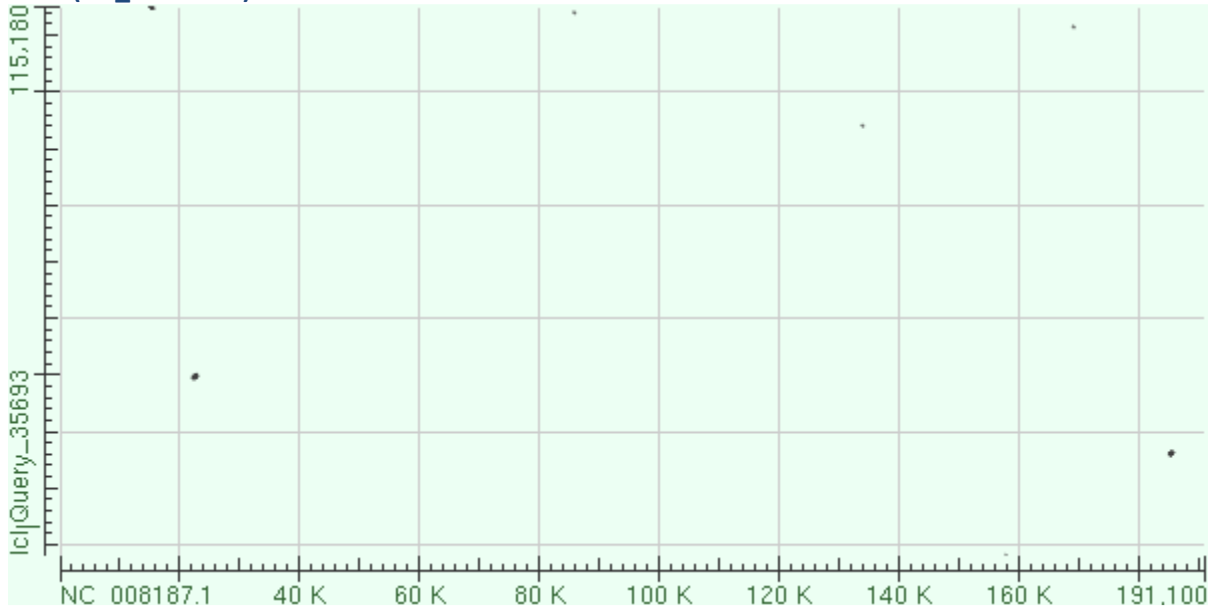

## Dotplot SDDV – *Iridovirus*

IIV-6 (NC\_003038.1)-SDDV

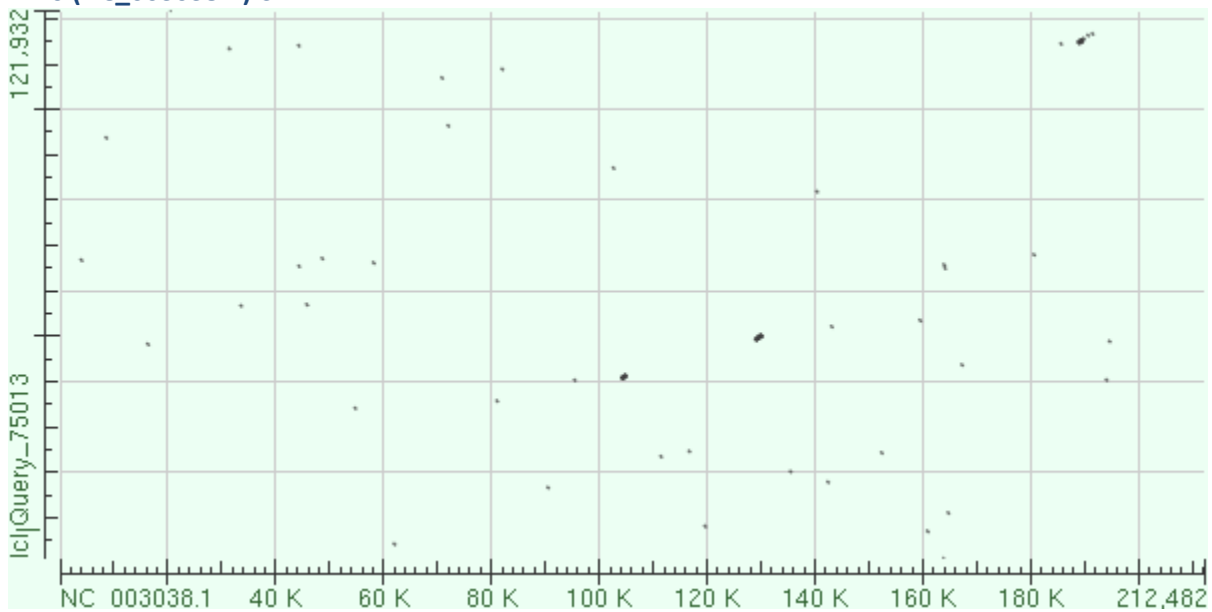

# Dotplot SDDV – *Ranavirus*

ATV (NC\_005832.1)-SDDV

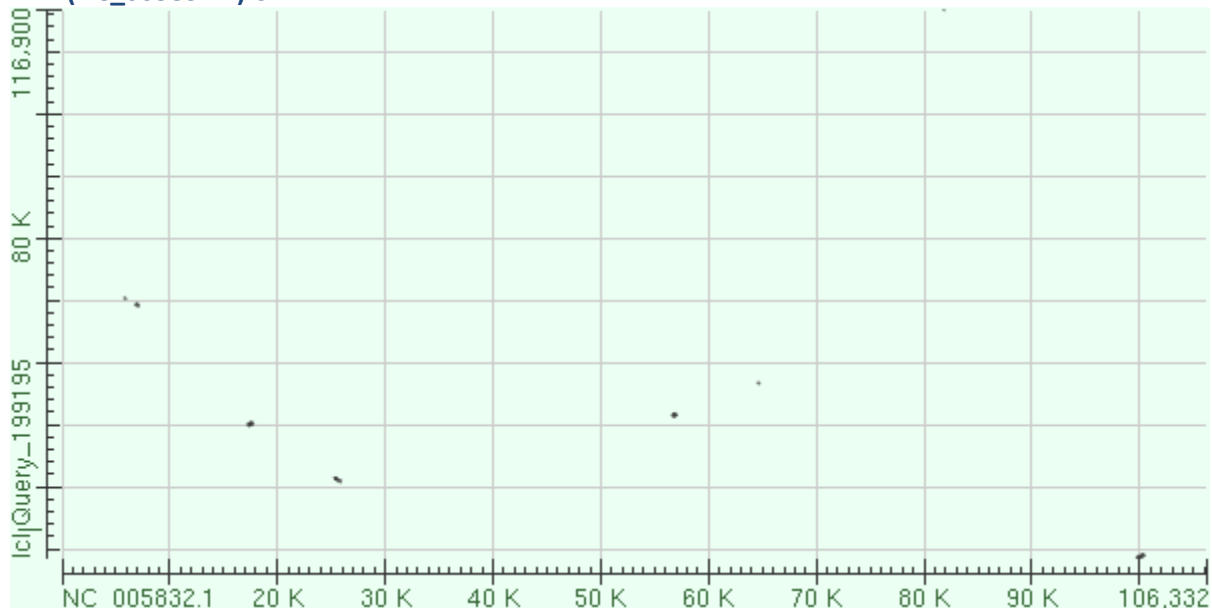

SGIV (NC\_006549.1)-SDDV

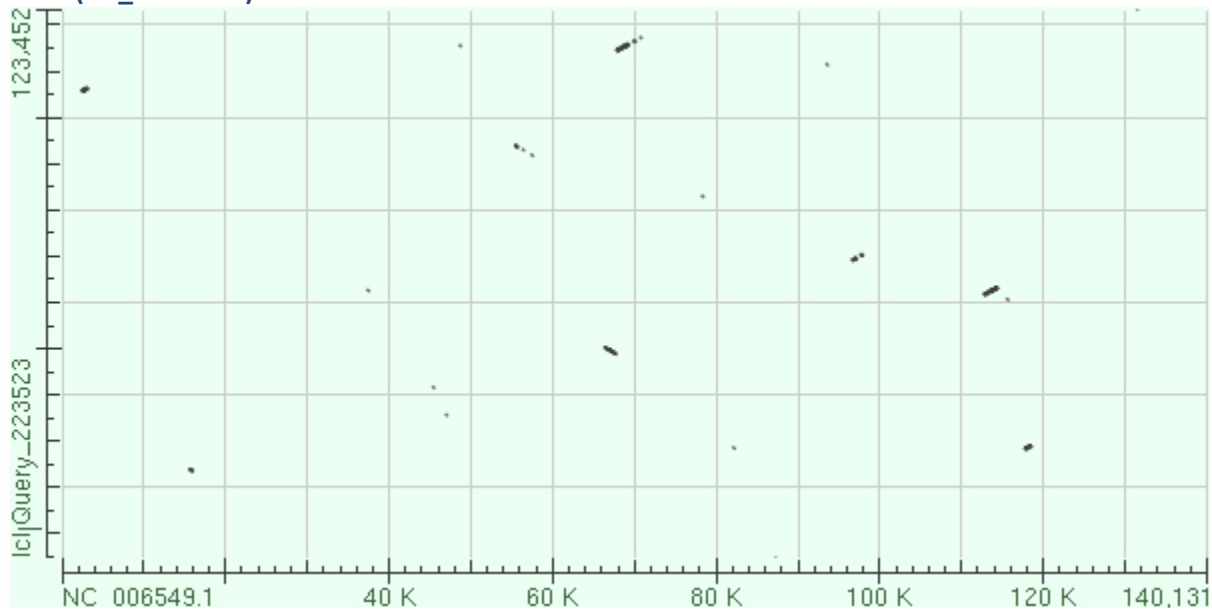

# Dotplot SDDV – *Lymphocystivirus*

LCDV china (NC\_005902)-SDDV

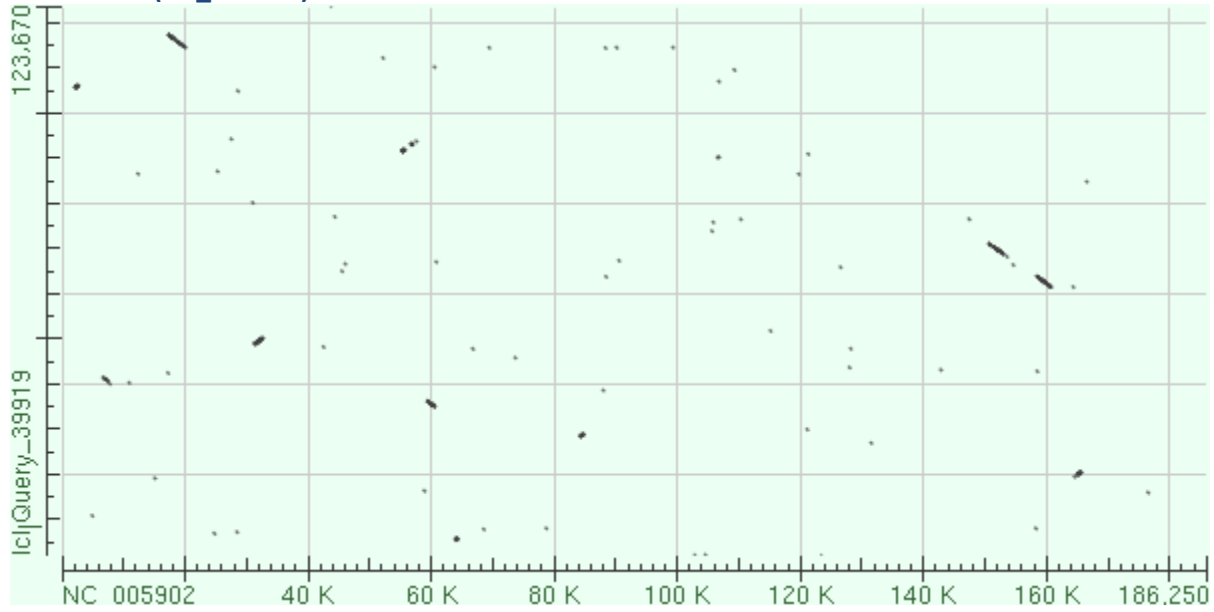

LCDV-1 (NC\_001824.1)-SDDV

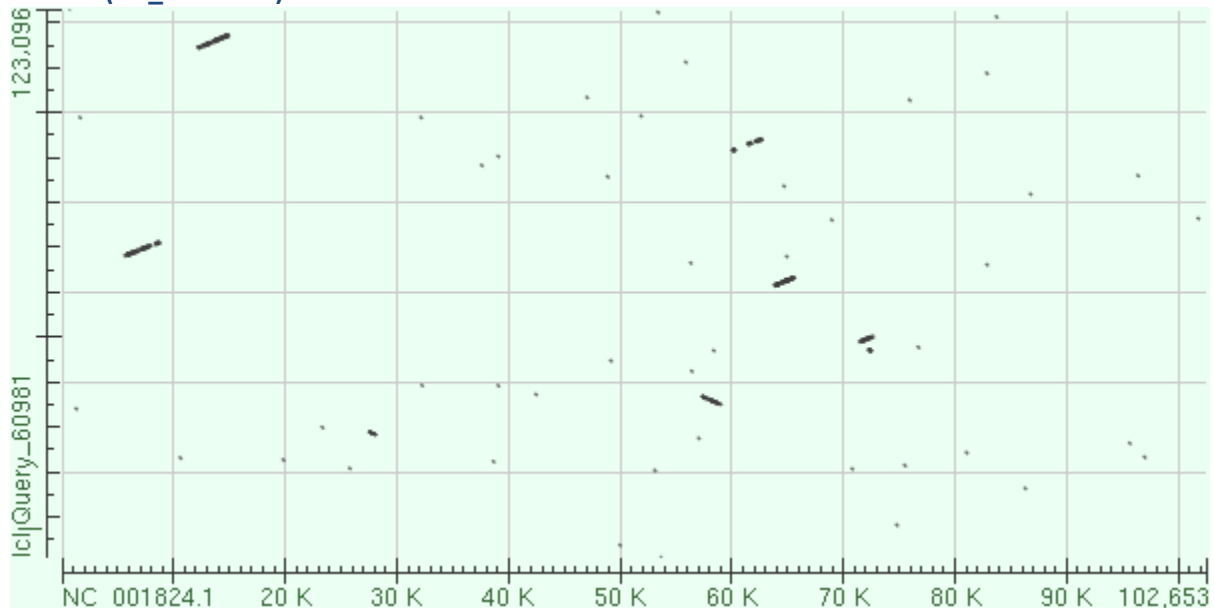

# Dotplot SDDV – SDDV

SDDV-SDDV

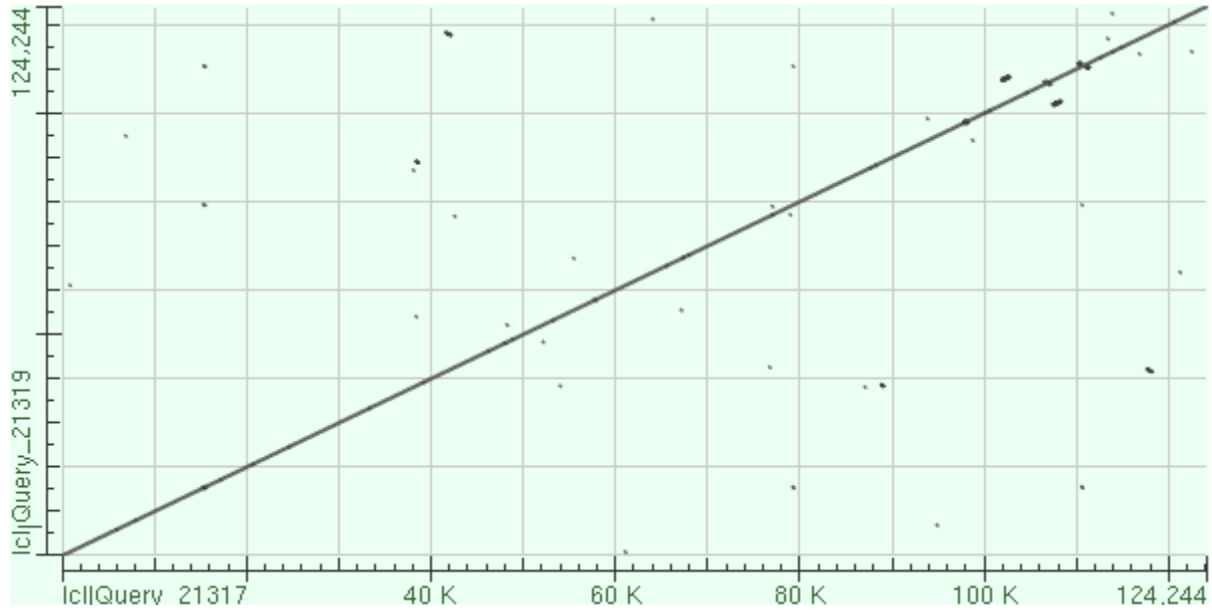

Supplement: ppat.1005074.s001.pdf [file ppat.1005074.s001.pdf]
