# Supplementary material for: A Novel Virus Causes Scale Drop Disease in Lates calcarifer
Source: PubMed Central journal article supplement (PMC4529248; doi:10.1371/journal.ppat.1005074), 2015-08-07
Supplement: ppat.1005074.s003.pdf [file ppat.1005074.s003.pdf]

**S3 Fig CPE on Seabass Brain cells.**

**A**

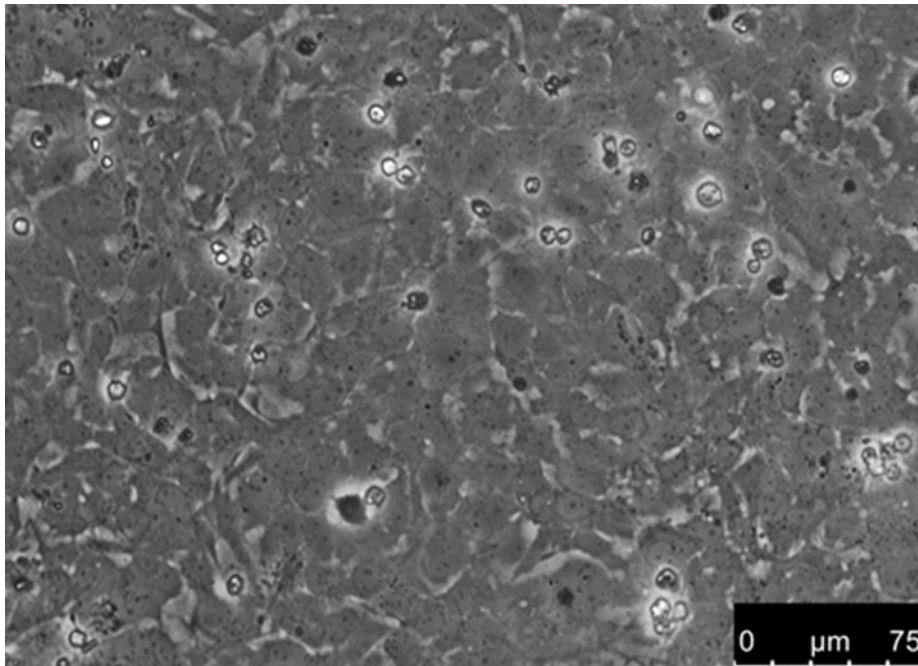

**B**

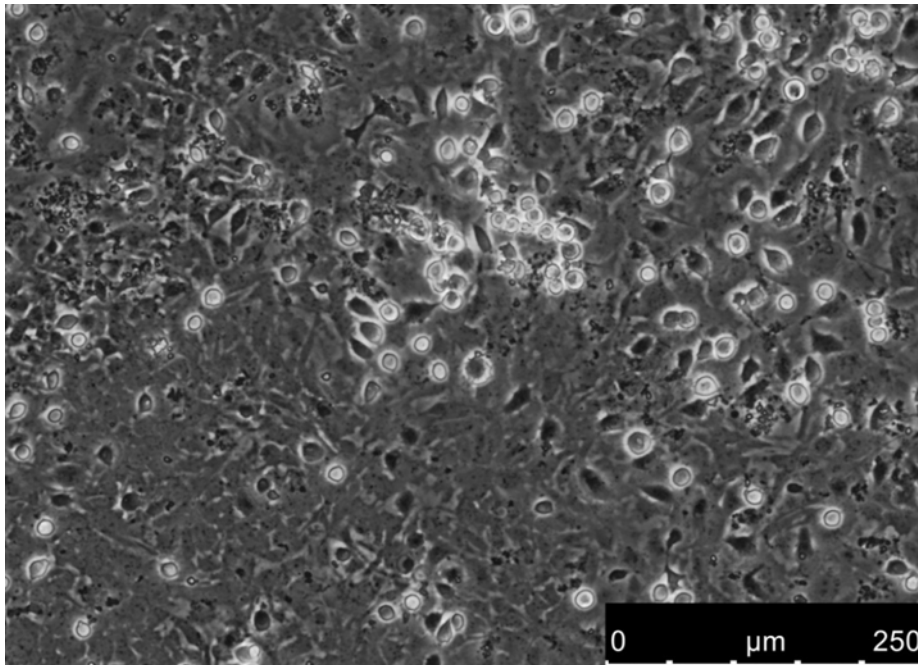

**S3 Fig legend: CPE on Seabass Brain cells.** Confluent monolayer at day 10 post inoculation of controls cells (A) and SDDV infected cells (B). Note round-up cells, which can clearly be distinguished from normal, attached cells on the monolayer. The culture was harvested and the  $^{10}\log$  TCID<sub>50</sub> was 6.5.
