# Supplementary material for: A Novel Virus Causes Scale Drop Disease in Lates calcarifer
Source: PubMed Central journal article supplement (PMC4529248; doi:10.1371/journal.ppat.1005074), 2015-08-07
Supplement: ppat.1005074.s005.pdf [file ppat.1005074.s005.pdf]

**S5 Figure. Analysis and quantification of GST-his-SDVV-MCP (rec-MCP) after purification**

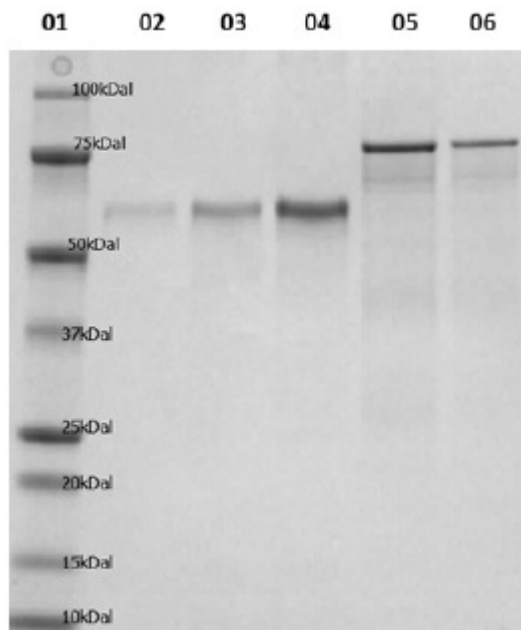

Lane 1, Protein size marker, Lane 2 to 4: concentration range of BSA used for quantification 25-50-100  $\mu\text{g}/\text{lane}$ ; Lane 5: SDDV-MCP undiluted; Lane 6: SDDV-MCP 2x diluted.
