# Supplementary material for: A Novel Virus Causes Scale Drop Disease in Lates calcarifer
Source: PubMed Central journal article supplement (PMC4529248; doi:10.1371/journal.ppat.1005074), 2015-08-07
Supplement: ppat.1005074.s006.pdf [file ppat.1005074.s006.pdf]

**S1 Table: SDDV qPCR on serum and tissue samples of fish with scale drop syndrome and healthy control fish**

|                                                | Threshold cycle (Cq) | Quantity (copies/ $\mu$ l) | qPCR |
|------------------------------------------------|----------------------|----------------------------|------|
| <b>Singapore, December 2010</b>                |                      |                            |      |
| Scale drop syndrome serum 1                    | 23.5                 | 4.4E4                      | POS  |
| Scale drop syndrome serum 2                    | 22.3                 | 1.0E5                      | POS  |
| Scale drop syndrome spleen 2                   | 21.9                 | 1.3E5                      | POS  |
| Scale drop syndrome kidney 2                   | 23.9                 | 3.7E4                      | POS  |
| Scale drop syndrome kidney 3                   | 21.5                 | 2.0E5                      | POS  |
| <b>Singapore, July 2011</b>                    |                      |                            |      |
| Scale drop syndrome serum 3                    | N/A                  | N/A                        | NEG  |
| Scale drop syndrome serum 4                    | 26.4                 | 5.0E3                      | POS  |
| Healthy fish serum 1                           | N/A                  | N/A                        | NEG  |
| Healthy fish serum 2                           | N/A                  | N/A                        | NEG  |
| Scale drop syndrome heart                      | 23.2                 | 6.0E4                      | POS  |
| Scale drop syndrome spleen 1                   | 25.0                 | 1.4E4                      | POS  |
| Scale drop syndrome kidney 1                   | 22.9                 | 7.0E4                      | POS  |
| Healthy fish kidney 1                          | N/A                  | N/A                        | NEG  |
| Healthy fish kidney 2                          | N/A                  | N/A                        | NEG  |
| Healthy fish kidney 3                          | N/A                  | N/A                        | NEG  |
| Healthy fish kidney 4                          | N/A                  | N/A                        | NEG  |
| Healthy fish spleen 1                          | N/A                  | N/A                        | NEG  |
| Healthy fish spleen 2                          | N/A                  | N/A                        | NEG  |
| <b>Indonesian serum samples, June 2012</b>     |                      |                            |      |
| Healthy fish 1                                 | N/A                  | N/A                        | NEG  |
| Healthy fish 2                                 | N/A                  | N/A                        | NEG  |
| Healthy fish 3                                 | N/A                  | N/A                        | NEG  |
| Early scale drop syndrome 1                    | 25.5                 | 1.5E4                      | POS  |
| Early scale drop syndrome 2                    | 22.8                 | 5.1E4                      | POS  |
| Early scale drop syndrome 3                    | 22.4                 | 7.6E4                      | POS  |
| Early scale drop syndrome 4                    | 21.7                 | 1.2E5                      | POS  |
| Early scale drop syndrome 5                    | N/A                  | N/A                        | NEG  |
| Late scale drop syndrome 1                     | 23.0                 | 9.1E4                      | POS  |
| Late scale drop syndrome 2                     | 29.2                 | 6.5E2                      | POS  |
| Late scale drop syndrome 3                     | 24.1                 | 2.0E4                      | POS  |
| Late scale drop syndrome 4                     | 24.7                 | 1.3E4                      | POS  |
| Late scale drop syndrome 5                     | 23.0                 | 4.8E4                      | POS  |
| <b>Indonesian serum samples, November 2012</b> |                      |                            |      |
| Scale drop syndrome fish 1                     | N/A                  | N/A                        | NEG  |
| Scale drop syndrome fish 2                     | N/A                  | N/A                        | NEG  |
| Scale drop syndrome fish 3                     | N/A                  | N/A                        | NEG  |
| Scale drop syndrome fish 4                     | 22.0                 | 1.7E5                      | POS  |
| Scale drop syndrome fish 5                     | 24.3                 | 3.3E4                      | POS  |
| Scale drop syndrome fish 6                     | 33.9                 | 3.9E1                      | NEG  |
| Scale drop syndrome fish 7                     | 22.4                 | 1.3E5                      | POS  |
| Scale drop syndrome fish 8                     | 29.4                 | 9.1E2                      | POS  |
| Scale drop syndrome fish 9                     | 30.9                 | 3.1E2                      | POS  |
| Scale drop syndrome fish 10                    | 29.4                 | 8.8E2                      | POS  |
| Scale drop syndrome fish 11                    | 20.4                 | 5.0E5                      | POS  |
| Scale drop syndrome fish 12                    | 21.7                 | 2.1E5                      | POS  |
| Scale drop syndrome fish 13                    | 21.0                 | 3.4E5                      | POS  |
| Scale drop syndrome fish 14                    | 18.6                 | 1.8E6                      | POS  |
| Scale drop syndrome fish 15                    | 19.7                 | 8.6E5                      | POS  |
| Scale drop syndrome fish 16                    | 20.1                 | 6.2E5                      | POS  |
| Scale drop syndrome fish 17                    | 20.3                 | 5.5E5                      | POS  |
| Scale drop syndrome fish 18                    | 21.6                 | 2.1E5                      | POS  |
| Scale drop syndrome fish 19                    | 20.0                 | 6.7E5                      | POS  |
| Scale drop syndrome fish 20                    | 21.5                 | 2.4E5                      | POS  |
| Healthy fish 1                                 | N/A                  | N/A                        | NEG  |
| Healthy fish 2                                 | N/A                  | N/A                        | NEG  |
| Healthy fish 3                                 | N/A                  | N/A                        | NEG  |

**N/A: below the threshold, therefore no detectable virus; POS: positive; NEG: Negative**
