# Supplementary material for: A Novel Virus Causes Scale Drop Disease in Lates calcarifer
Source: PubMed Central journal article supplement (PMC4529248; doi:10.1371/journal.ppat.1005074), 2015-08-07
Supplement: ppat.1005074.s007.pdf [file ppat.1005074.s007.pdf]

**S2 Table . Genome location of conserved genes within the *Iridoviridae* family**

| Gene name <sup>b</sup>                                        | SDDV <sup>a</sup> | Megalocytivirus |       |       |       |      | Lymphocystivirus |        | Ranavirus |     |     |      |      |     | Iridovirus | Chloro-iridovirus |       |
|---------------------------------------------------------------|-------------------|-----------------|-------|-------|-------|------|------------------|--------|-----------|-----|-----|------|------|-----|------------|-------------------|-------|
|                                                               |                   | ISKNV           | OSGIV | RBIV  | TRBIV | RSIV | LCDV-1           | LCDV-C | SGIV      | GIV | FV3 | STIV | TFV  | ATV | EHNV       | IIV-6             | IIV-3 |
| 1 Putative replication factor and/or DNA binding/packing      | 17L               | 61L             | 60L   | 57L   | 56L   | 92R  | 91L              | 180R   | 116R      | 67R | 1R  | 1R   | 105R | 95R | 100R       | 282R              | 79L   |
| 2 Myristilated membrane protein                               | 30L               | 90,5L           | 88,5L | 85L   | 83R   | 575R | 89L              | 38R    | 19R       | 4R  | 2L  | 2L   | 2L   | 1L  | 1L         | 337L              | 47R   |
| 3 DNA-dep RNA pol-II largest subunit                          | 76L               | 28L             | 31L   | 29L   | 28L   | 239R | 7L               | 190R   | 104L      | 59L | 8R  | 10R  | 8R   | 6R  | 7R         | 176R\343L         | 90L   |
| 4 Putative NTPase I                                           | 104L              | 63L             | 63L   | 59L   | 58L   | 13R  | 70L              | 075L   | 60R       | 30R | 9L  | 11L  | 9L   | 7L  | 8L         | 22L               | 87L   |
| 5 Unkown                                                      | 33L               | 96L             | 93L   | 91.5  | 88L   | 550R | 57L              | 100L   | 118R      | 68R | 12L | 14L  | 12L  | 91R | 95R        | 287R              | 56L   |
| 6 ATPase-like protein                                         | 35L               | 123R            | 119R  | 116R  | 113R  | 407R | 30R              | 114L   | 134L      | 73L | 15R | 16R  | 16R  | 87R | 92L        | 75L               | 88R   |
| 7 Serine-threonine protein kinase                             | 15L               | 55L             | 56L   | 53L   | 52L   | 111R | 5L               | 45R    | 39L       | 17L | 19R | 21R  | 19R  | 84L | 89L        | 380R              | 10L   |
| 8 Helicase family                                             | 16L               | 56L             | 57L   | 54L   | 53L   | 101R | 4L               | 7L     | 54R       | 28R | 21L | 24L  | 21L  | 82R | 86R        | 67R               | 4R    |
| 9 D5 family NTPase involved in DNA replication                | 40R               | 109L            | 106L  | 101L  | 99L   | 493R | 69L              | 78L    | 52L       | 27L | 22R | 25R  | 22R  | 81L | 85L        | 184R              | 121R  |
| 10 Putative tyrosine kinase/lipolysaccharide modifying enzyme | 37R               | 114L            | 111L  | 109L  | 105L  | 463R | 110R             | 172R   | 78L\81L   | 44L | 27R | 31R  | 29R  | 60R | 62R        | 179R              | 35R   |
| 11 NIF-NLI interaction factor                                 | 99L               | 5L              | 6L    | 6L    | 5L    | 385R | 43L              | 147L   | 61R       | 31R | 37R | 41R  | 40R  | 67R | 72R        | 355R              | 104L  |
| 12 Unkown                                                     | 91L               | 76L             | 75L   | 72L   | 69L   | 639R | 92R              | 234R   | 57L       | 29L | 41R | 45R  | 45R  | 72R | 77R        | 295L              | 16R   |
| 13 Myristilated membrane protein                              | 61L               | 7L              | 8L    | 8L    | 7L    | 374R | 35L              | 157R   | 88L       | 49L | 53R | 55R  | 55R  | 53L | 53L        | 458R              | 6R    |
| 14 Serine-threonine protein kinase                            | 65R               | 13R             | 15R   | 13R   | 13R   | 349R | 77L              | 177L   | 150L      | 83L | 57R | 60R  | 59R  | 49L | 58L        | 98R               | 98L   |
| 15 DNA pol family B exonuclease                               | 70R               | 19R             | 22R   | 20R   | 20R   | 317L | 72R              | 202L   | 128R      | 71R | 61R | 63R  | 63R  | 46L | 44L        | 37L               | 120R  |
| 16 DNA-dep RNA pol-II second largest subunit                  | 122L              | 34R             | 36R   | 33R   | 33R   | 224L | 13L              | 25R    | 73L       | 40L | 63L | 64R  | 65L  | 44R | 43R        | 428L              | 9R    |
| 17 Ribonucleotide reductase small subunit                     | 52R               | 24R             | 27R   | 26R   | 25R   | 268L | 15L              | 41L    | 47L       | 22L | 68L | 71L  | 71L  | 39R | 38R        | 376L              | 48L   |
| 18 Ribonuclease III                                           | 25R               | 87R             | 85R   | 83R   | 80R   | 596L | 74R              | 186R   | 84L       | 46L | 81L | 87L  | 85L  | 25R | 24R        | 142R              | 101R  |
| 19 Transcription elongation factor TFIIIS                     | 126R              | 29L             | 32L   | 31L   | 29L   | 238R | 97R              | 115R   | 85R       | 47R | 82R | 88R  | 86R  | 24L | 23L        | 349L              | 55R   |
| 20 Proliferating cell nuclear antigen                         | 39L               | 112R            | 109R  | 107R  | 102R  | 487L | 2L               | 196L   | 68L       | 35L | 85R | 91R  | 90R  | 20L | 19L        | 436R              | 60L   |
| 21 Deoxynucleoside kinase                                     | 125L              | 32R             | 34R   | 31R   | 31R   | 234L | 73R              | 27R    | 67L       | 34L | 86R | 92R  | 91R  | 19L | 18L        | 143R              | 29R   |
| 22 ErvI/Alr family                                            | 3L                | 43L             | 45L   | 44L   | 42L   | 156R | 55L              | 141L   | 70R       | 37R | 89R | 94R  | 94R  | 16L | 16L        | 347L              | 96R   |
| 23 Major capsid protein                                       | 60L               | 6L              | 7L    | 7L    | 6L    | 380R | 80L              | 43L    | 72R       | 39R | 91R | 96R  | 96R  | 14L | 14L        | 274R              | 14L   |
| 24 Immediate early protein ICP-46                             | 36L               | 115R            | 112R  | 108R  | 106R  | 458L | 24L              | 161R   | 162L      | 90L | 92R | 97R  | 97R  | 13L | 13L        | 393L              | 39R   |
| 25 Hypothetical protein - Clostridium tetani                  | 24R               | 86L             | 84.5R | 83.5R | 79R   | 600L | 9R               | 152L   | 98R       | 56R | 94L | 99L  | 100R | 11R | 11R        | 307L              | 33L   |
| 26 Putative XPPG-RAD2 type nuclease                           | 73L               | 27L             | 30L   | 28L   | 27L   | 256R | 107R             | 168R   | 97L       | 55L | 96R | 100R | 101R | 10L | 10L        | 369L              | 76L   |

- **a:** SDDV: scale drop disease virus; ISKNV: infectious spleen and kidney necrosis virus; OSGIV: orange-spotted grouper iridovirus; RBIV: rock bream iridovirus; TRBIV: turbot reddish body virus; RSIV: red sea bream iridovirus; LCDV-1: lymphocystis disease virus 1; LCDV-C: lymphocystis disease virus China; SGIV: Singapore grouper iridovirus; GIV: grouper iridovirus; FV3: Frog virus 3; STIV: soft-shelled turtle iridovirus; TFV: tiger frog virus; ATV: *Ambystoma tigrinum* virus; EHNV: epizootic haematopoietic necrosis virus; IIV-6: invertebrate iridovirus type 6; IIV-3: invertebrate iridescent virus 3.
- **b:** Gene name according to Eaton et al. (reference [9] in main text).
