# Supplementary material for: A Novel Virus Causes Scale Drop Disease in Lates calcarifer
Source: PubMed Central journal article supplement (PMC4529248; doi:10.1371/journal.ppat.1005074), 2015-08-07
Supplement: ppat.1005074.s009.pdf [file ppat.1005074.s009.pdf]

**S4 Table. Re-isolation of SDDV from pooled sera of experimentally infected fish (4<sup>th</sup> Koch's postulate)**

| Serum                                                   | Serum dilution                           |           |
|---------------------------------------------------------|------------------------------------------|-----------|
|                                                         | 1:100                                    | 1:1000    |
|                                                         | Time until full CPE on SK21 cells (days) |           |
| <b>Intraperitoneal (IP)</b> day 7 post infection        | <b>3*</b>                                | <b>3</b>  |
| <b>IP</b> day 10 post infection                         | <b>3</b>                                 | <b>3</b>  |
| <b>Intramuscular (IM)</b> day 7 post infection          | <b>3</b>                                 | <b>3</b>  |
| <b>IM</b> day 10 post infection                         | <b>3</b>                                 | <b>3</b>  |
| <b>IP + IM</b> day 7 post infection                     | <b>3</b>                                 | <b>3</b>  |
| <b>IP + IM</b> day 10 post infection                    | <b>3</b>                                 | <b>3</b>  |
| <b>IP (1:10)</b> day 7 post infection                   | <b>3</b>                                 | <b>3</b>  |
| <b>IP (1:10)</b> day 10 post infection                  | <b>3</b>                                 | <b>10</b> |
| <b>Non-infected</b> control day 7 post mock infection** | no CPE                                   | no CPE    |
| <b>Non-infected</b> control day 10 post mock infection  | no CPE                                   | no CPE    |
| SDDV control virus                                      | <b>3</b>                                 | <b>3</b>  |
| SDDV control virus                                      | <b>3</b>                                 | <b>3</b>  |

\* Presence of SDDV in all CPE positive cultures was confirmed by PCR and sequencing.

\*\* Harvests of the cell passages of non-infected control sera pools were inoculated on fresh SK21 cells at 1:100 and 1:1000 dilutions for a second passage. Also in the second passage no CPE was observed.
