# Supplementary material for: A Novel Virus Causes Scale Drop Disease in Lates calcarifer
Source: PubMed Central journal article supplement (PMC4529248; doi:10.1371/journal.ppat.1005074), 2015-08-07
Supplement: ppat.1005074.s010.pdf [file ppat.1005074.s010.pdf]

**S5 Table. Presence/absence of SDDV in serum of vaccinated fish on day 28**

| <b>Prototype Vaccines</b>                | <b>Fish number</b> | <b>SDDV PCR</b> |
|------------------------------------------|--------------------|-----------------|
| Formalin-inactivated SDDV                | 1                  | <b>N*</b>       |
|                                          | 2                  | <b>N</b>        |
|                                          | 3                  | <b>N</b>        |
|                                          | 4                  | <b>N</b>        |
|                                          | 5                  | <b>N</b>        |
| Binary ethyleneimine-inactivated SDDV    | 1                  | <b>POS*</b>     |
|                                          | 2                  | <b>N</b>        |
|                                          | 3                  | <b>POS</b>      |
|                                          | 4                  | <b>POS</b>      |
|                                          | 5                  | <b>N</b>        |
| Recombinant Major Capsid Protein of SDDV | 1                  | <b>N</b>        |
|                                          | 2                  | <b>N</b>        |
|                                          | 3                  | <b>N</b>        |
|                                          | 4                  | <b>N</b>        |
|                                          | 5                  | <b>N</b>        |
| Placebo                                  | 1**                | <b>POS</b>      |
|                                          | 2                  | <b>POS</b>      |

\* N: Negative, POS: positive in the SDDV PCR

\*\* Results of the only two surviving fish
