# Supplementary material for: A Novel Virus Causes Scale Drop Disease in Lates calcarifer
Source: PLoS Pathog. 2015 Aug 7;11(8):e1005074. doi: 10.1371/journal.ppat.1005074 (PMC4529248; doi:10.1371/journal.ppat.1005074)
Supplement: S3 Table — (PDF) [file ppat.1005074.s008.pdf]

**S3 Table. CPE positive SK21 cultures contain SDDV**

| Dilution*       | CPE | SDDV DNA<br>copies<br>per 2 µl | Dilution        | CPE | SDDV DNA<br>copies<br>per 2 µl |
|-----------------|-----|--------------------------------|-----------------|-----|--------------------------------|
| 10 <sup>6</sup> | +   | 5.77E+07                       | 10 <sup>7</sup> | +   | 1.37E+07                       |
| 10 <sup>6</sup> | +   | 1.95E+07                       | 10 <sup>7</sup> | +   | 1.67E+07                       |
| 10 <sup>6</sup> | +   | 2.12E+07                       | 10 <sup>7</sup> | +   | 4.94E+06                       |
| 10 <sup>6</sup> | +   | 1.98E+07                       | 10 <sup>7</sup> | -   | 4.54E+02                       |
| 10 <sup>6</sup> | +   | 1.58E+07                       | 10 <sup>7</sup> | +   | 3.55E+05                       |
| 10 <sup>6</sup> | +   | 2.11E+07                       | 10 <sup>7</sup> | +   | 9.84E+06                       |
| 10 <sup>6</sup> | +   | 2.76E+07                       | 10 <sup>7</sup> | -   | 2.19E+05                       |
| 10 <sup>6</sup> | +   | 1.64E+07                       | 10 <sup>7</sup> | -   | 4.65E+01                       |
| 10 <sup>6</sup> | +   | 1.71E+07                       | 10 <sup>7</sup> | -   | 3.34E+05                       |
| 10 <sup>6</sup> | +   | 3.42E+07                       | 10 <sup>7</sup> | +   | 3.61E+06                       |

\* Ten SK21 cultures inoculated with 10<sup>-6</sup>, and 10<sup>-7</sup> dilutions of a cell culture medium sample from the first passage of SDDV on SK21 cells were analyzed for CPE and SDDV-DNA on day 9 post infection. In all wells with CPE the virus is present in high concentrations, furthermore in two wells without CPE also SDDV DNA was present (10<sup>7</sup> dilution)
