# Supplementary material for: A Novel Virus Causes Scale Drop Disease in Lates calcarifer
Source: PLoS Pathog. 2015 Aug 7;11(8):e1005074. doi: 10.1371/journal.ppat.1005074 (PMC4529248; doi:10.1371/journal.ppat.1005074)
Supplement: S4 Fig — Virus (7.5 10Log TCID50/mL) was incubated with 10% or 50% chloroform. A 100-fold decrease in infectivity was observed due to incubation with chloroform. The remaining infectivity of 5,5 10Log TCID50 /mL indicates that a lipid envelope is not essential for replication of the SDDV. (PDF) [file ppat.1005074.s004.pdf]

**S4 Fig. Sensitivity of SDDV to chloroform treatment.**

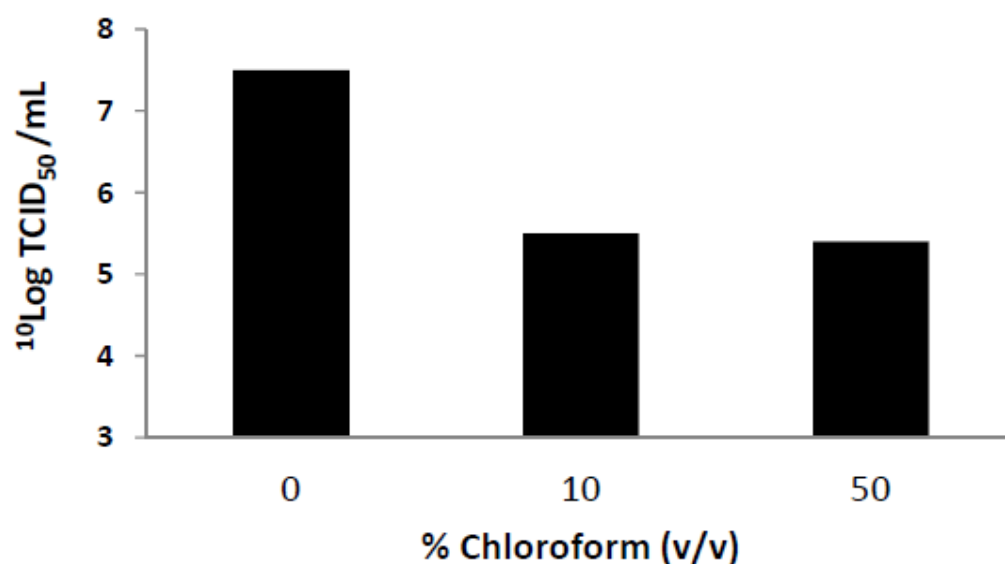

| Sample treatment | $10\text{Log TCID}_{50}$<br>per mL | Mean<br>$10\text{Log TCID}_{50}$<br>per mL |
|------------------|------------------------------------|--------------------------------------------|
| Chloroform 0%    | 7.42-7.50*                         | 7.46                                       |
| Chloroform 10%   | 5.49-5.57                          | 5.53                                       |
| Chloroform 50%   | 5.29-5.41                          | 5.35                                       |

\* Results of duplicate experiments

**Legend figure S4. Sensitivity of SDDV to chloroform treatment.** Virus ( $7.5 \times 10\text{Log TCID}_{50}/\text{mL}$ ) was incubated with 10% or 50% chloroform. A 100-fold decrease in infectivity was observed due to incubation with chloroform. The remaining infectivity of  $5.5 \times 10\text{Log TCID}_{50}/\text{mL}$  indicates that a lipid envelope is not essential for replication of SDDV.
